# Supplementary material for: DNMT3A/miR-129-2-5p/Rac1 Is an Effector Pathway for SNHG1 to Drive Stem-Cell-like and Invasive Behaviors of Advanced Bladder Cancer Cells
Source: MDPI journal article supplement (doi:10.3390/cancers14174159), 2022-08-27
Supplement: s1 [file s1]

***Supplementary Materials:***

**DNMT3A/*miR-129-2-5p*/Rac1 Is an Effector Pathway for *SNHG1* to Drive Stem Cell-like and Invasive Behaviors of Advanced Bladder Cancer Cells**

Jiheng Xu<sup>1,#</sup>, Rui Yang<sup>1,#</sup>, Jingxia Li<sup>1,#</sup>, Lidong Wang<sup>2</sup>, Mitchell Cohen<sup>1</sup>  
Diane M. Simeone<sup>2,3</sup>, Max Costa<sup>1,\*</sup> and Xue-Ru Wu<sup>3,4,5,\*</sup>

\*Send editorial correspondence to:

Dr. Xue-Ru Wu  
Department of Urology  
New York University School of Medicine  
Veterans Affairs Medical Center in Manhattan  
423 E23 Street, 6<sup>th</sup> Floor, Room 6028 West  
New York, New York 10010  
Tel: 212-263-4167  
Fax: 212-951-5424  
Email: [xue-ru.wu@med.nyu.edu](mailto:xue-ru.wu@med.nyu.edu)

Or

Dr. Max Costa  
Department of Environmental Medicine  
New York University School of Medicine  
341 East 25th Street  
New York, NY, 10010  
Tel: 646-469-5298  
E-mail: [max.costa@nyulangone.org](mailto:max.costa@nyulangone.org)

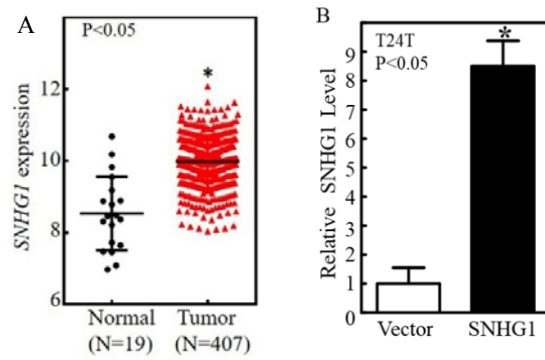

**Figure S1. Expression of *SNHG1* in human bladder cancer and enforced expression of *SNHG1* in bladder cancer cell line.** (A) Comparison of *SNHG1* expression in human bladder tumor vs. normal bladder tissues by RNA-seq (Illumina-Hiseq) based on TCGA database. Long and short horizontal lines denote mean and SD, respectively. (B) *SNHG1* overexpression was verified in T24T(*SNHG1*) in comparison to T24T(Vector) cells. The asterisk (\*) indicates a statistically significant increase of *SNHG1* in T24T(*SNHG1*) cells than in T24T(Vector) cells ( $P < 0.05$ ).

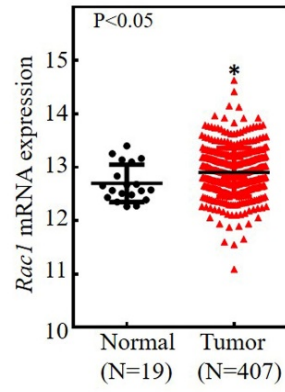

**Figure S2. Expression of *Rac1* mRNA in human bladder cancer.** *Rac1* mRNA expression in human bladder tumor vs. normal bladder tissues by RNA-seq (Illumina-Hiseq) based on TCGA database.

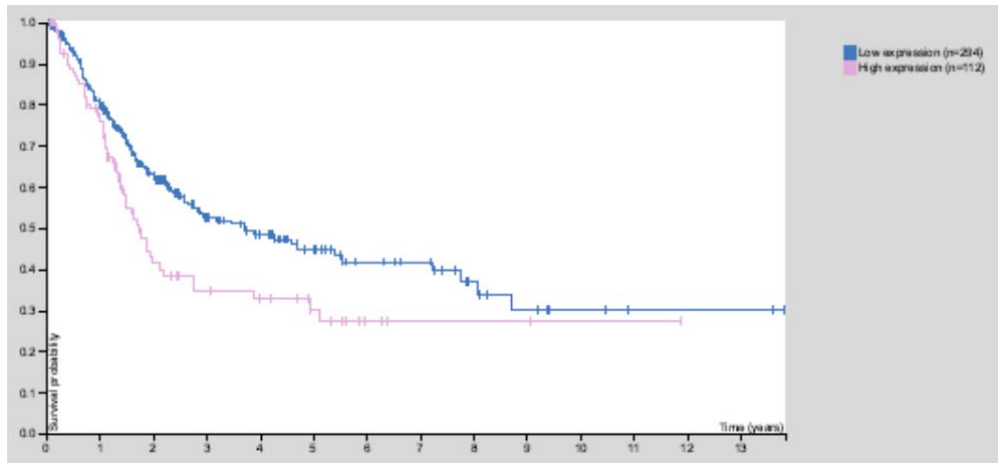

**Figure S3. Rac1 mRNA expression in human bladder cancer.** Analysis of Human Protein Atlas shows that the high expression of Rac1 in human MIBC is strongly associated with poor survival. N=406. P=0.0087.

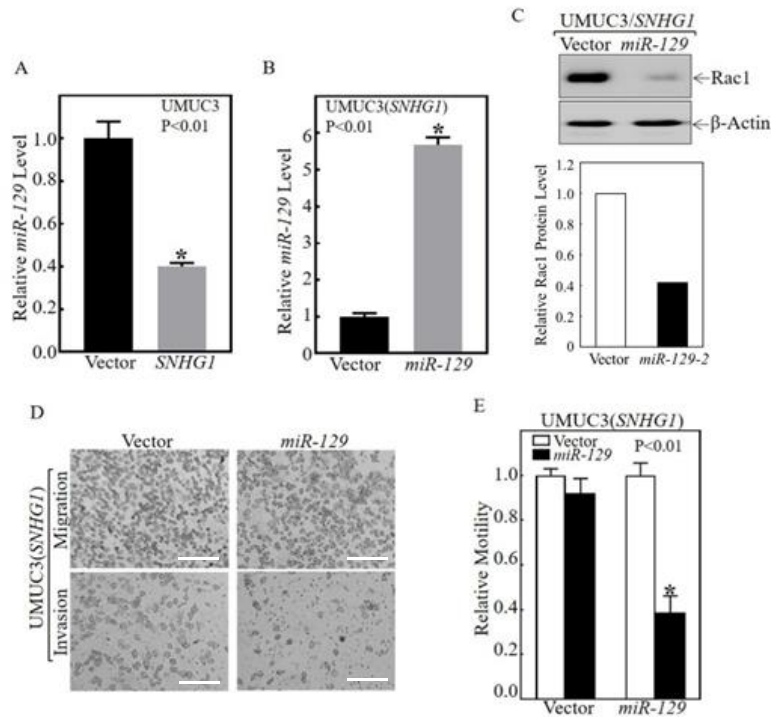

**Figure S4. *SNHG1* overexpression inhibited *miR-129-5p* expression in UMUC3 cells.** (A) Quantitative real-time PCR was carried out to determine the expression levels of *miR-129-2* in UMUC3 cells. (B) Plasmids bearing *miR-129-2* were stably transfected into UMUC3(*SNHG1*) cells. The stable transfectants were identified by real-time PCR. (C, **Top panel**) Protein lysates extracted from the indicated cells were subjected to Western blotting to determine Rac1 expression.  $\beta$ -Actin was used as a loading control. (C, **Bottom panel**) Relative protein levels determined by densitometry and expressed as ratios versus  $\beta$ -Actin. (D-E) UMUC3(*SNHG1*) cells and UMUC3(*SNHG1*/*miR-129-2*) cells were subjected to a transwell invasion assay, and the migration and invasion were calculated and presented relative to UMUC3(*SNHG1*) control. The results were presented as mean  $\pm$  SD from triplicate experiments and asterisk (\*) indicated a significant decrease in comparison to UMUC3(*SNHG1*) cells ( $p < 0.01$ ). Bars in (D) equal to 100  $\mu$ m.

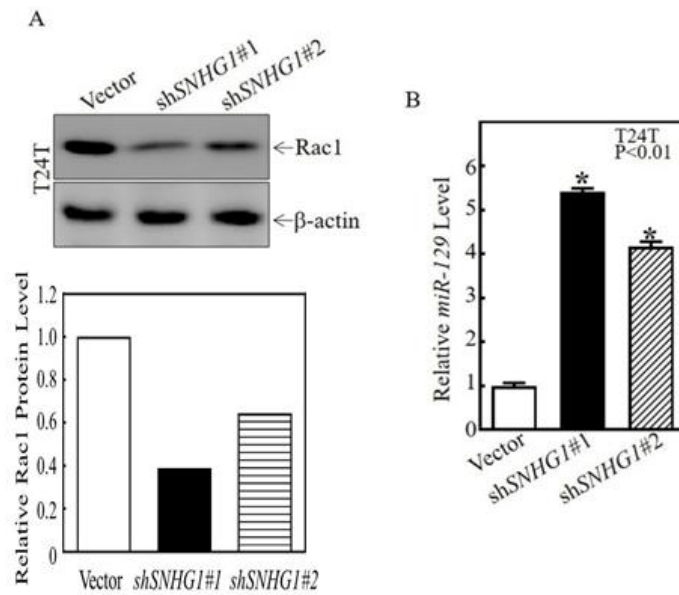

**Figure S5. *SNHG1* inhibition decreased Rac1 expression and promoted *miR-129-5p* expression in UMUC3 cells. (A, Top panel)** The total protein extracts from the indicated cells were subjected to Western blotting to determine for the expression of Rac1 expression.  $\beta$ -Actin served as a protein loading control. **(A, Bottom panel)** Relative protein levels determined by densitometry and expressed as ratios versus  $\beta$ -Actin. **(B)** Quantitative real-time PCR was carried out to determine the expression levels of *miR-129-5p* in the indicated cells. The results were presented as mean  $\pm$  SD from triplicate experiments and asterisk (\*) indicated a significant increase in comparison to T24T(Vector) cells ( $p < 0.01$ ).

**Table S1.** The potential *miRNA* binding sites in *Rac1* mRNA 3'UTR region

|                                                 |                                                                    |
|-------------------------------------------------|--------------------------------------------------------------------|
| Position 56-62 of rac1 3' UTR<br>hsa-miR-129-5p | 5' ...UUUGUACGCUUUGCUCAAAAAAA...<br>3' CGUUCGGGUCUGGCGUUUUUC ...   |
| Position 66-72 of rac1 3' UTR<br>hsa-miR-129-5p | 5' ...UUGCUCAAAAAAAAAACAAAAAAAA...<br>3' CGUUCGGGUCUGGCGUUUUUC     |
| Position 79-85 of rac1 3' UTR<br>hsa-miR-129-5p | 5' ...AACAAAAAAAAAAAAAAAAACAAAAAAAA...<br>3' CGUUCGGGUCUGGCGUUUUUC |
| Position 987-993 of rac1 3' UTR<br>hsa-miR-137  | 5' ...AACCCCUUCUGACUGAGCAAUAU...<br>3' GAUGCGCAUAAGAAUUCGUUAUU     |
| Position 308-315 of rac1 3' UTR<br>hsa-miR-182  | 5' ...UGUUCAGAUUAAGAGUUGCCAAA...<br>3' UCACACUCAAGAUGGUAACGGUUU    |
| Position 537-544 of rac1 3' UTR<br>hsa-miR-101  | 5' ...UCCCGACAUAACAUUGUACUGUA...<br>3' AAGUCAAUAGUGUCAUGACAU       |
| Position 904-910 of rac1 3' UTR<br>hsa-miR-365  | 5' ...AUGCCUCCCCAAAUUGGGCAUUU...<br>3' UAUUCCUAAAAAUCCCCGUAAU      |
| Position 309-315 of rac1 3' UTR<br>hsa-miR-96   | 5' ...GUUCAGAUUAAGAGUUGCCAAAA...<br>3' UCGUUUUUACACGAUCACGGUUU     |
| Position 127-133 of rac1 3' UTR<br>hsa-miR-194  | 5' ...UCAAUGCCAACUUUUUGUUACAG...<br>3' AGGUGUACCUCAACGACAAUGU      |
