# Supplementary material for: DNMT3A/miR-129-2-5p/Rac1 Is an Effector Pathway for SNHG1 to Drive Stem-Cell-like and Invasive Behaviors of Advanced Bladder Cancer Cells
Source: MDPI journal article supplement (doi:10.3390/cancers14174159), 2022-08-27

Figure2A

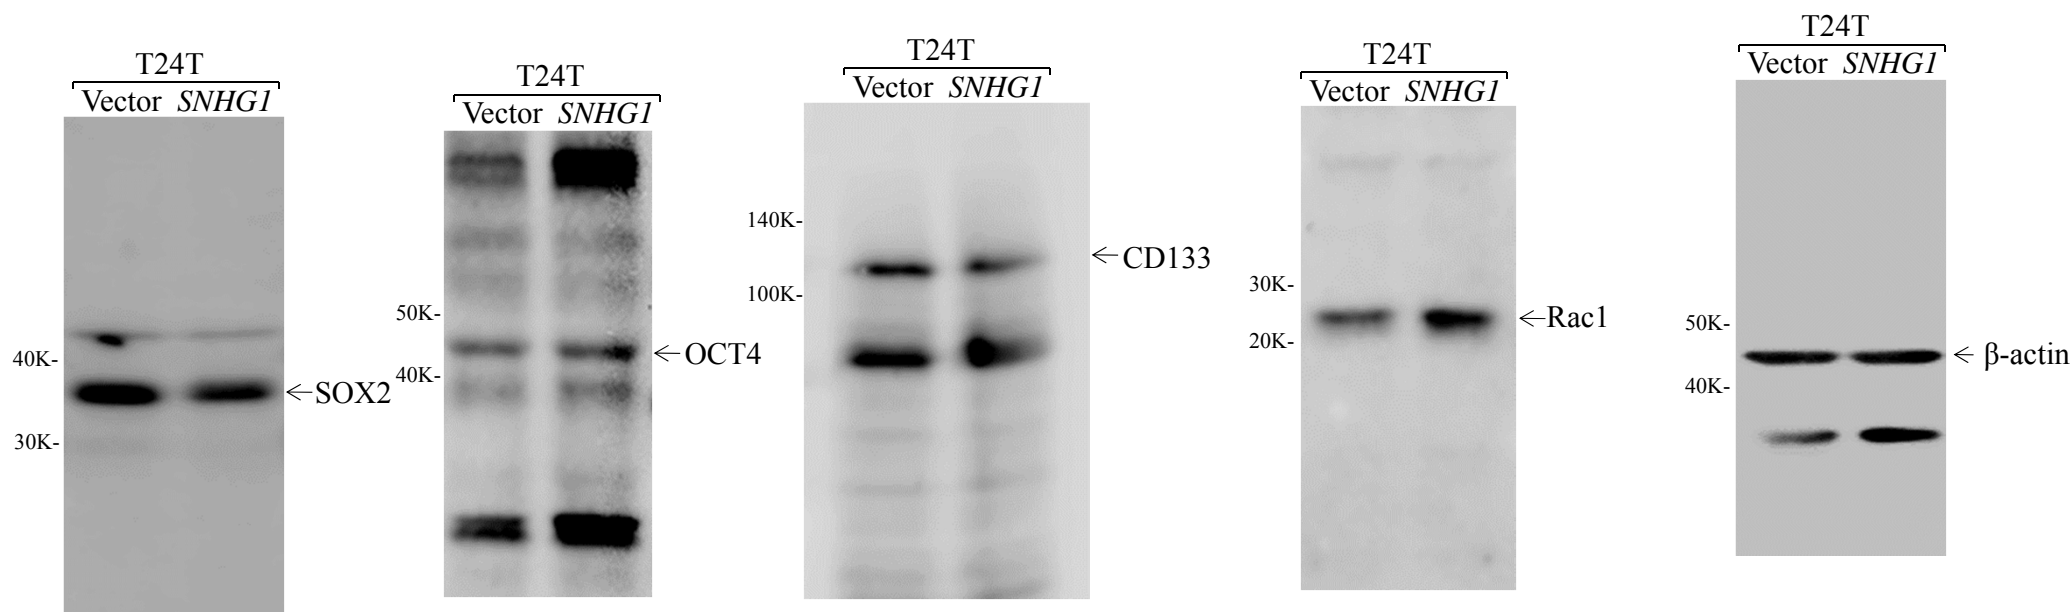

Figure2B

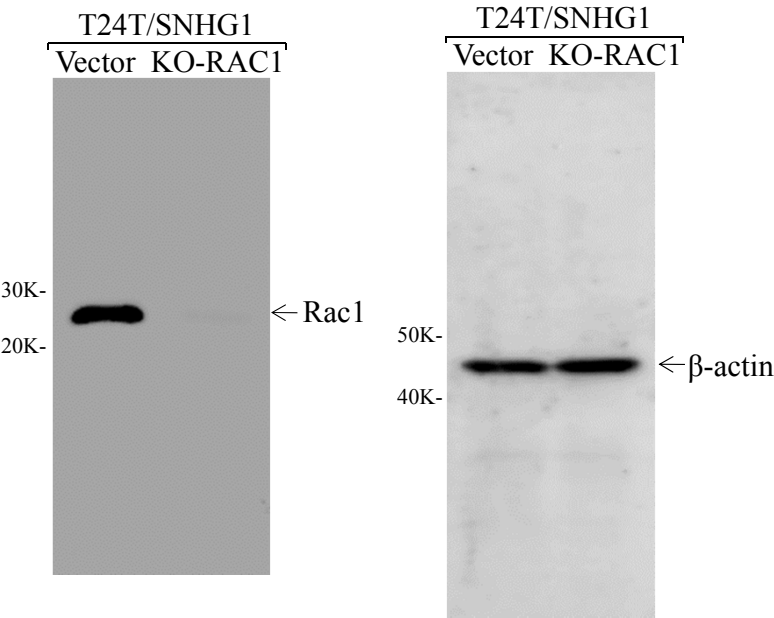

Figure2J

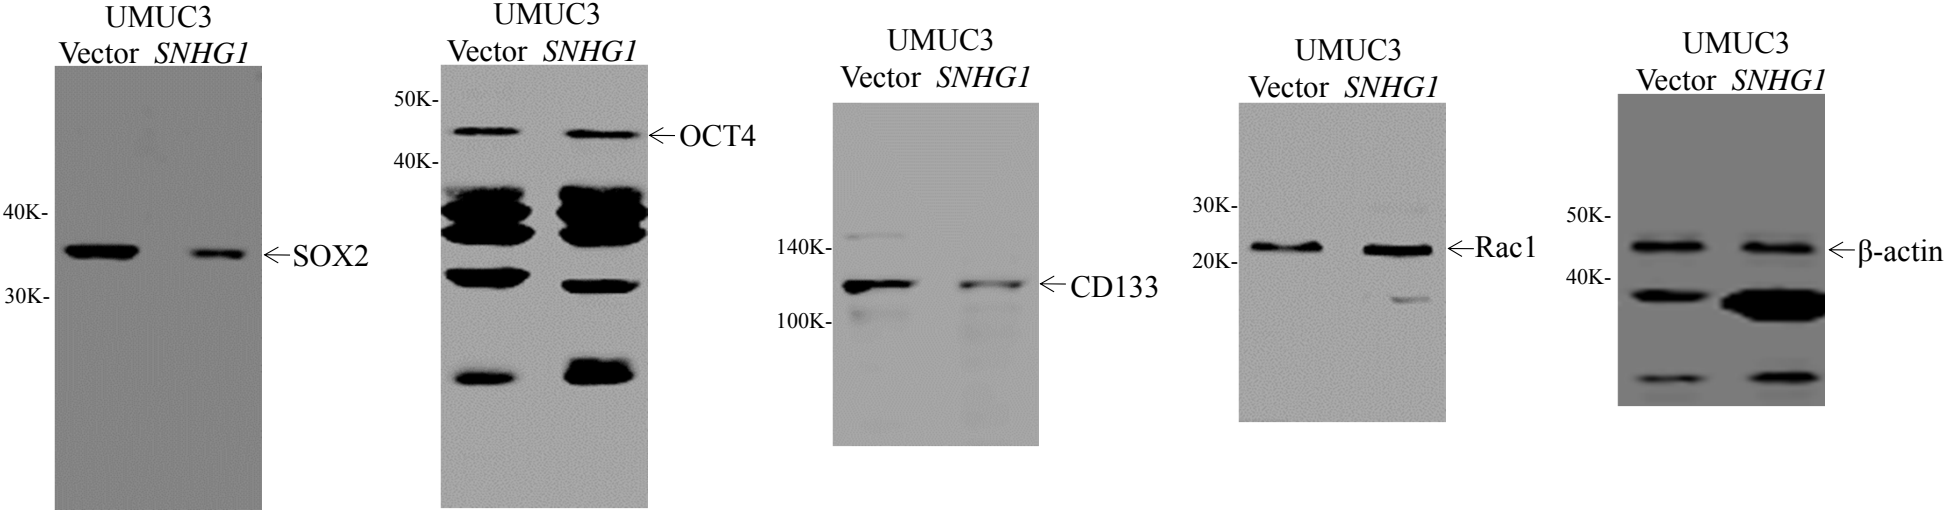

Figure2K

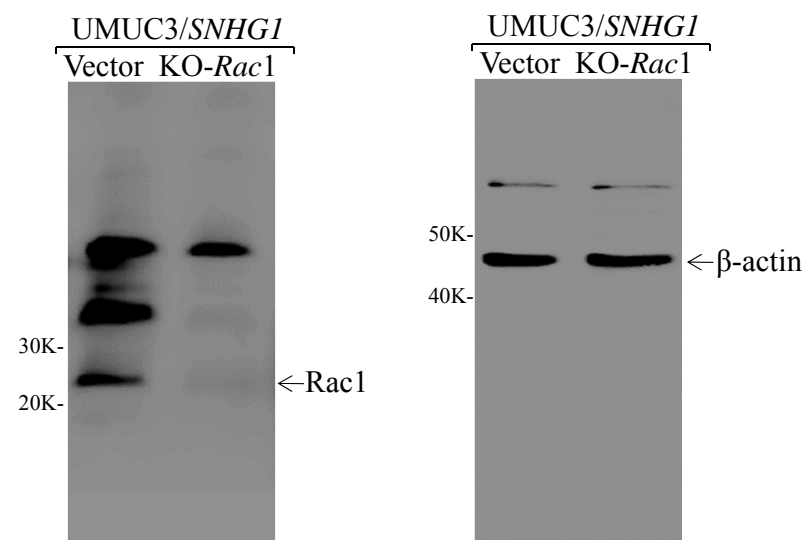

Figure3F

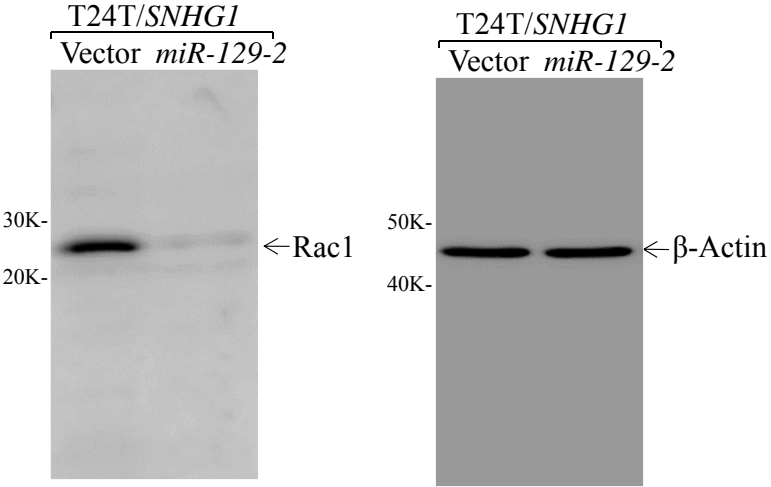

Figure4D

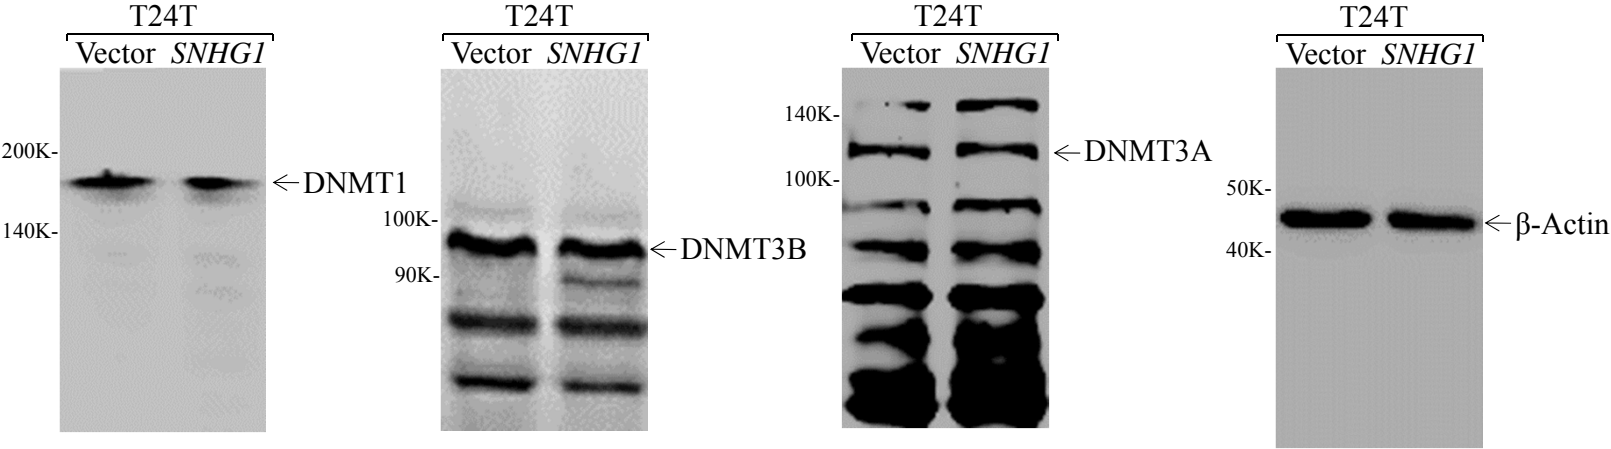

Figure4G

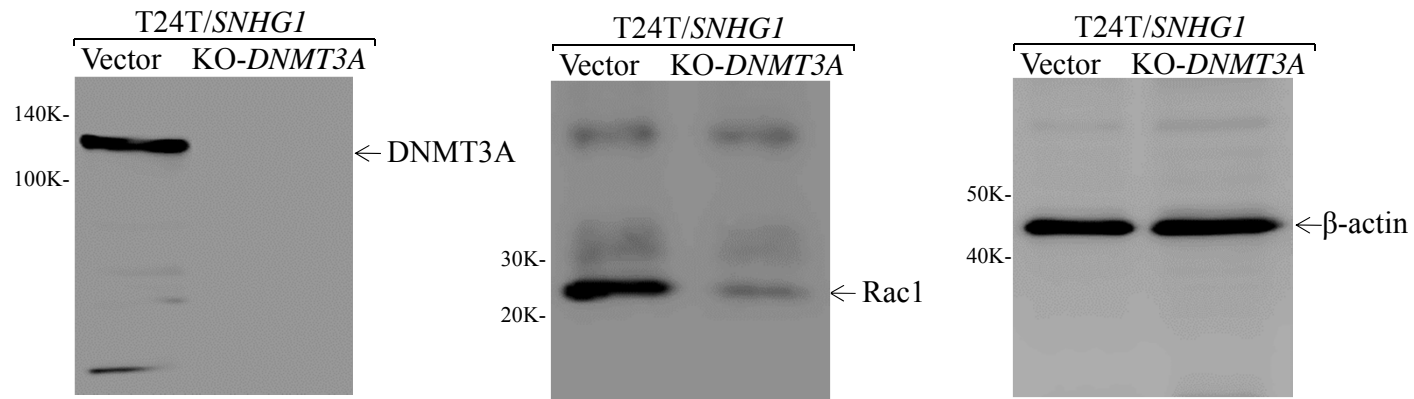

Figure5A

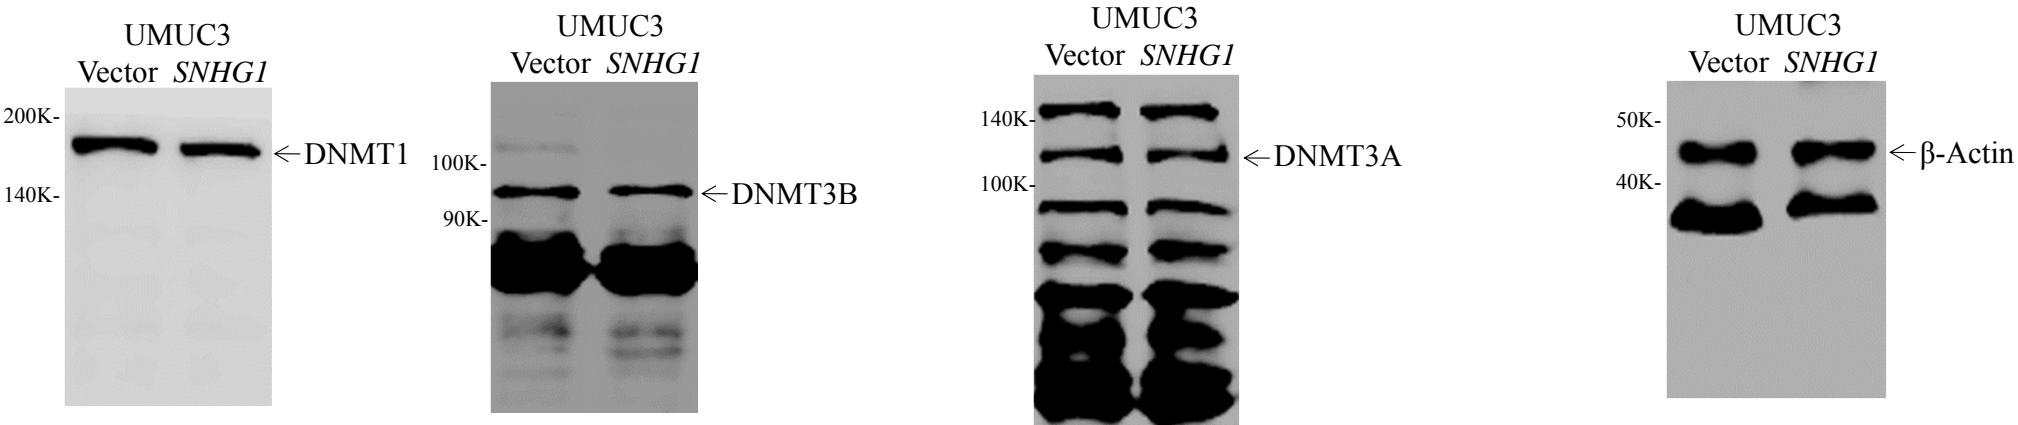



Figure5C

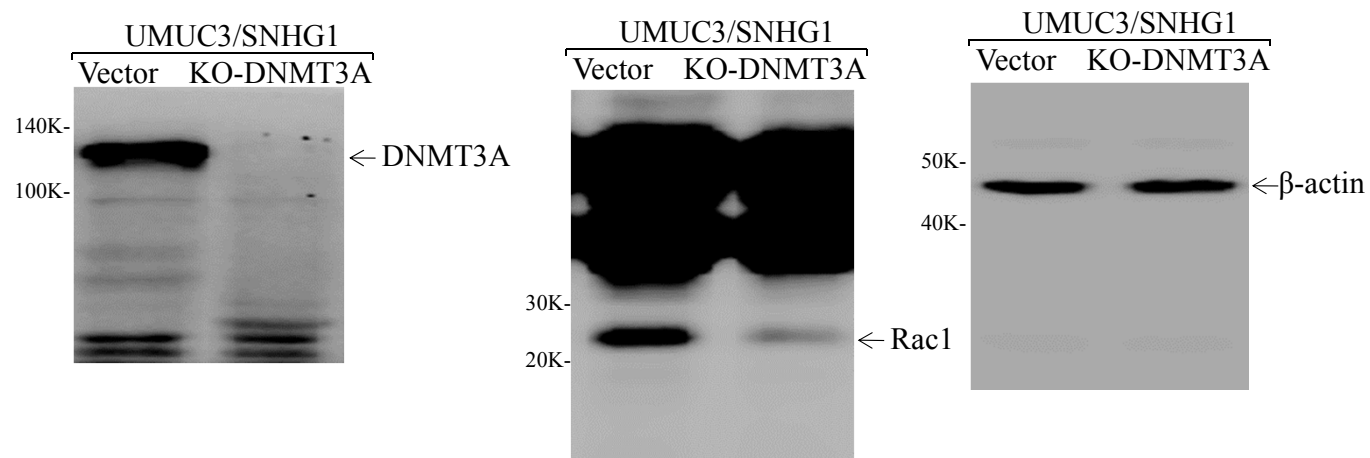

Figure6C

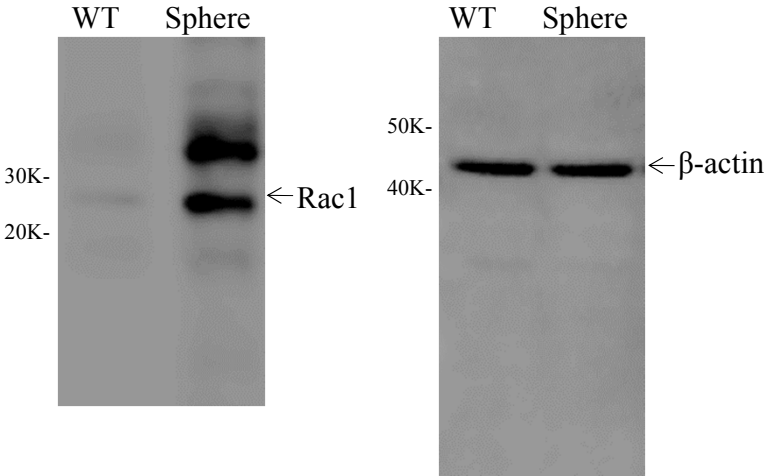

FigureS4C

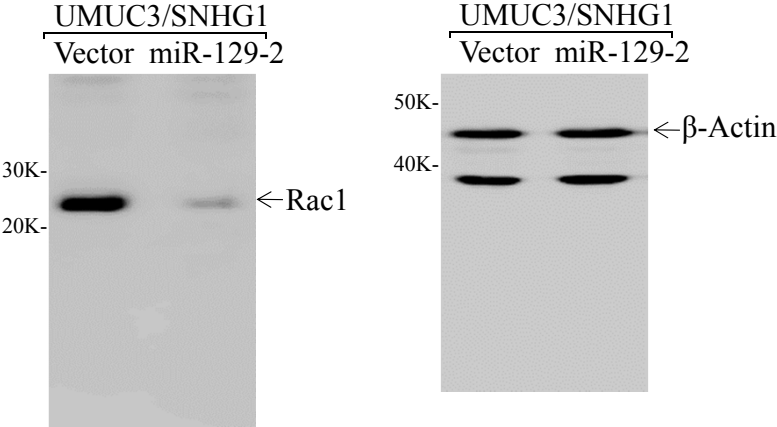

FigureS5A

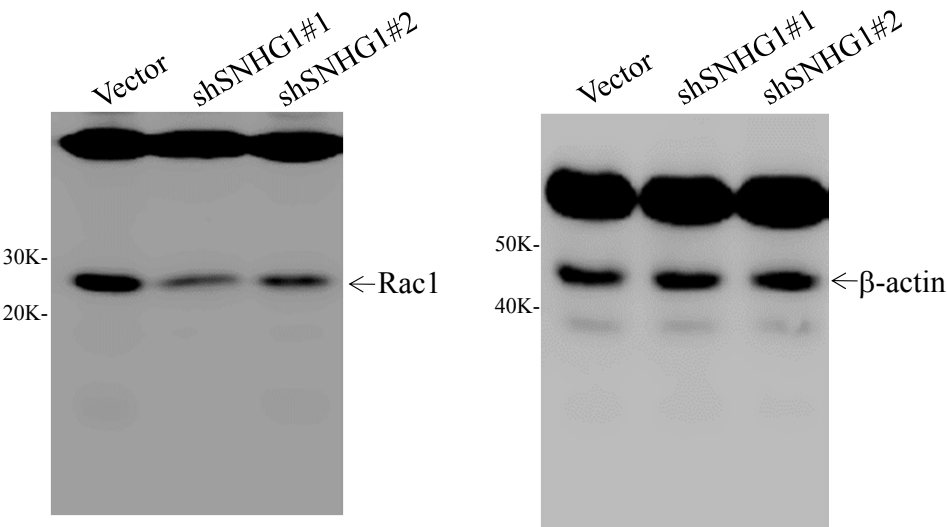

Supplement: s1 [file s1]
